# Supplementary figures and images for: Microbiota-Induced Changes in Drosophila melanogaster Host Gene Expression and Gut Morphology
Source: PubMed Central journal article supplement — mBio. 2014 May 27;5(3):e01117-14. doi: 10.1128/mBio.01117-14 (PMC4045073; doi:10.1128/mbio.01117-14), 2014-05-27

## Supplemental Figure S2

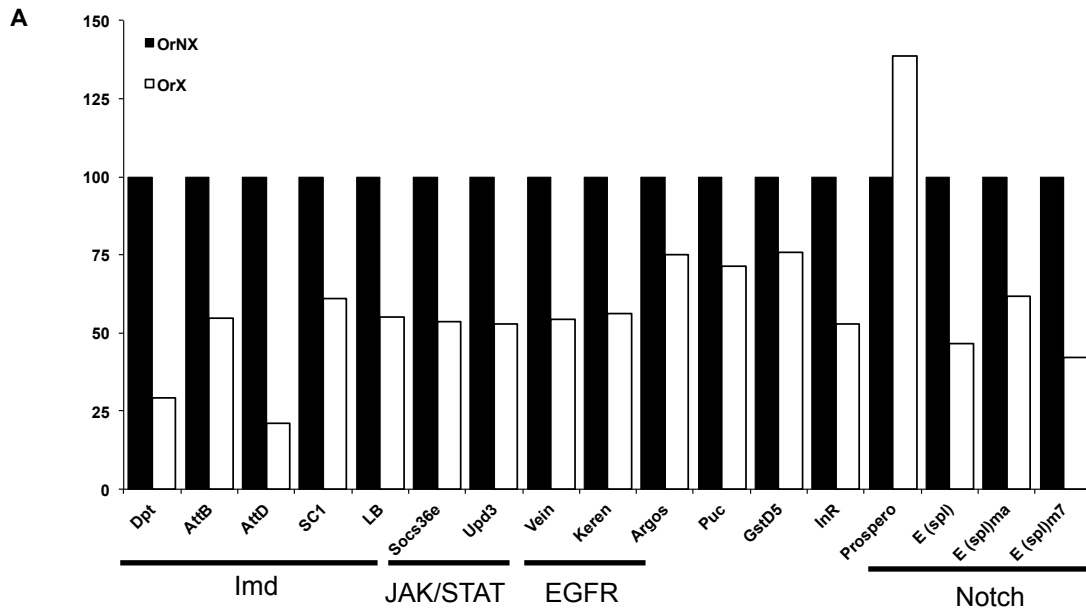

**B DD-lacZ**

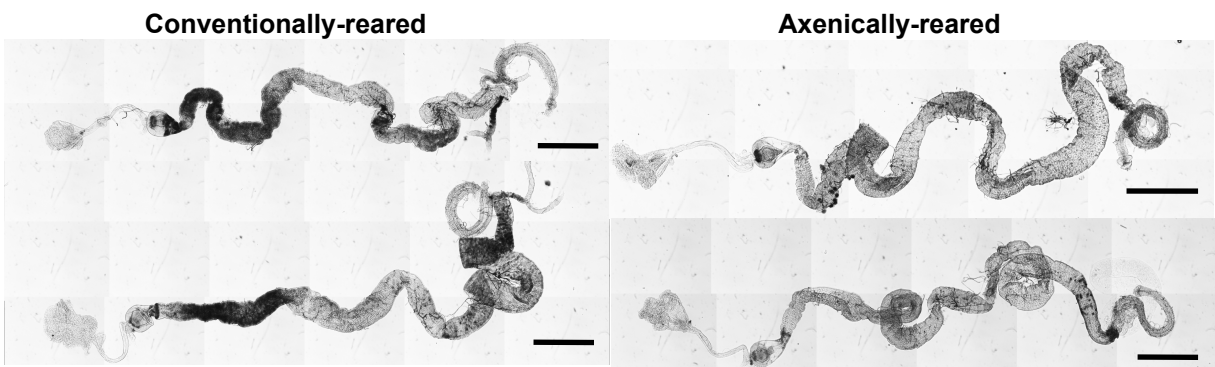

**C Upd3-GFP**

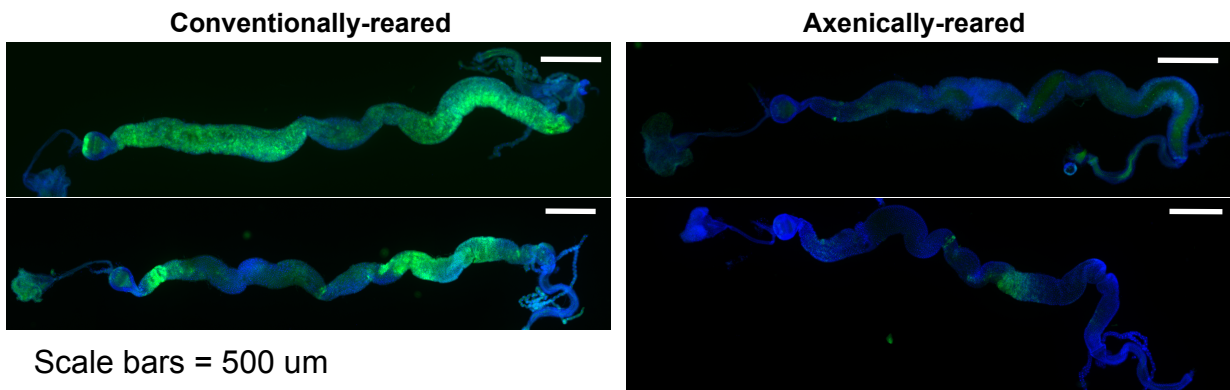

Supplement: mbo003141838sf02.pdf [file mbo003141838sf02.pdf]
